# 1 **Maternal health care services utilization in the amid of** 2 **COVID-19 pandemic in West Shoa Zone, Central Ethiopia**

3 Kababa Temesgen<sup>1¶</sup>, Negash Wakgari<sup>1,¶\*</sup>, Bikila Tefera<sup>1¶</sup>, Belay Tafa<sup>2&</sup>, Getu Alemu<sup>2&</sup>, Fekadu  
4 Wandimu<sup>1&</sup>, Tolera Gudisa<sup>1&</sup>, Tolosa Gishile<sup>3&</sup>, Gurmessa Daba<sup>1&</sup>, Gizachew Abdissa<sup>1&</sup>, Bikila  
5 Soboka<sup>4&</sup>

6 <sup>1</sup>Department of Midwifery, College of Medicine and Health Sciences, Ambo University, Ambo,  
7 Ethiopia

8 <sup>2</sup>Department of Medical Laboratory Sciences, College of Medicine and Health Sciences, Ambo  
9 University, Ambo, Ethiopia

10 <sup>3</sup>Department of Obstetrics and Gynecology, Ambo University Referral Hospital, Ambo, Ethiopia

11 <sup>4</sup>Ethiopian Public Health Institute, Health System and Reproductive Health Research, Addis  
12 Ababa, Ethiopia

13 \*Corresponding author

14 E-mail: [negashwakgari@yahoo.com](mailto:negashwakgari@yahoo.com) (NW)

15

16 <sup>¶</sup>These authors contributed equally to this work

17 <sup>&</sup>These authors also contributed equally to this work

## 18 **Abstract**

19 The novel coronavirus (COVID-19) is an infectious disease caused by a newly discovered  
20 coronavirus. Despite strong efforts that have been taking place to control the pandemic globally,  
21 the virus is on the rise in many countries. Hence, this study assessed the maternal health care  
22 services utilization in the amid of the COVID-19 pandemic in West Shoa Zone, Central Ethiopia.  
23 Community-based cross-sectional study was conducted among 844 pregnant women or those  
24 gave birth in the last 6 months before the study. A multi-stage sampling technique was used to  
25 select the study participants. The data were collected through face-to-face interview using a  
26 semi-structured questionnaire. Logistic regressions were performed to identify the presence of  
27 significant associations, and adjusted odds ratio with 95%CI was employed for the strength and  
28 directions of association between the independent and outcome variables. A P-value of <0.05  
29 was used to declare statistical significance. The prevalence of maternal health service utilization  
30 during the COVID-19 pandemic was 64.8%. The odds of maternal health service utilization was  
31 higher among mothers who had primary (AOR=2.16, 95%CI: 1.29-3.60), secondary (AOR=1.97,  
32 95%CI: 1.13-3.44), and college and above education (AOR=2.89, 95%CI: 1.34-6.22) than those  
33 who could not read and write. In addition, mothers who did travel 25-74 km (AOR= 0.37,  
34 95%CI: 0.23-0.59) and 75-99 km (AOR= 0.10, 95%CI: 0.05-0.19) to reach health facility had a  
35 lower odds of maternal health service utilization than those who did travel < 24 km. Moreover,  
36 mothers who earn 1000-2000 (AOR= 3.10, 95%CI: 1.73-5.55) and > 2000 birr (AOR=2.66  
37 95%CI: 1.52-4.64) had higher odds of maternal health service utilization than those who earn  
38 <500 birr. Similarly, the odds of utilizing maternal health service were higher among mothers  
39 who did not fear COVID-19 infection (AOR= 2.79, 95%CI: 1.85-4.20), who had not had to

40 request permission from husband to visit the health facility (AOR= 7.24, 95%CI: 2.65-19.75),  
41 who had practiced COVID-19 prevention measure (AOR=5.82, 95%CI: 3.87-8.75), and used  
42 face mask (AOR= 2.06, 95% CI: 1.28-3.31) than their counterpart. Empowering mothers and  
43 creating awareness on the COVID-19 prevention is recommended to improve maternal health  
44 service utilization during the COVID-19 pandemic.

45 **Keywords:** COVID-19, maternal health service utilization, West Shoa

## 46 **Introduction**

47 The novel coronavirus is a virus causing respiratory illness, commonly known as COVID-19 first  
48 noted in December 2019 in Wuhan, China, and has since then spread to countries in the world  
49 [1]. The World Health Organization (WHO) has declared the virus outbreak as a global  
50 pandemic on March 11, 2020 [2]. As of September 14, 2020, the virus has infected more than 28  
51 million and killed more than 900,000 people [3]. Africa contributes 4% of infection (more than 1  
52 million) and 3% deaths (more than 23,000) [3]. The WHO classifies maternal health services  
53 into: antenatal care (ANC), delivery services, and postnatal care, as essential health services to  
54 continue during the COVID-19 pandemics [4, 5].

55 The maternal deaths were predicted to rise by 17% in the best-scenario and 43% in the case of  
56 the worst scenario due to the COVID-19 pandemics [6]. Movement restrictions, transport  
57 challenges, and anxiety over possibly being exposed to coronavirus are acting as the barrier to  
58 maternal health service utilization [6, 7]. The ongoing COVID-19 has affected the perceptions  
59 of pregnant women; more than half of the participants in a study done in Naples hospital reported  
60 the psychological impact of COVID-19 as severe, and a similar number of pregnant women to

61 worry of vertical transmission of the infection [7]. Strained health care systems, disruptions in  
62 care, and redirected resources might result in non-pandemic-related maternal morbidity and  
63 mortality and reproductive health crisis which are particularly true for African countries  
64 including Ethiopia with low-resource health systems [6, 8]. Obstetric healthcare providers may  
65 not be able to provide the highest quality care during the COVID-19 pandemic with essential  
66 precautions in place, client-provider communication is severely affected and the time to get the  
67 care needed may take longer as health workers try to protect themselves from the infection [9].

68 The International Confederation of Midwives and the Royal College of Midwives support  
69 community birth (home birth) for healthy women if there are appropriate midwife staffing and  
70 referrals are facilitated in obstetric emergencies, where these are not available, it may be  
71 necessary to modify available services, seeking at all times to maximize the provision of safe and  
72 positive birth experience to all women [4]. Ethiopia's midwives grapple with COVID-19 while  
73 ensuring safe delivery, and maternal health workers reported that COVID-19 travel restrictions  
74 in Ethiopia are forcing pregnant women to give birth at home [8]. Maternity services in low  
75 resource countries are adapting to provide antenatal, delivery, and postnatal care amidst a rapidly  
76 shifting health system environment due to the COVID-19 pandemic [10]. Economic despair due  
77 to lost jobs, limited care, and restricted health services, overburdened health systems, restricted  
78 travel, and changing priorities at the primary care level are some of the burdens women had to  
79 face during the pandemic [11].

80 Many efforts have been taking place to enhance maternal health service utilization including  
81 information, education, and communication to raise awareness regarding the protection of  
82 mother and child during COVID-19, some countries have tried to open temporary birth centers,

83 help hotlines virtual consultation with obstetricians have been provided via telemedicine  
84 services, to women seeking maternal health care service [6]. There is a consensus that the use of  
85 maternal health care services reduces maternal and child mortality and improves the reproductive  
86 health of women (12). Family planning, ANC, use of skilled delivery attendants, and PNC  
87 services are maternal health services that can significantly reduce maternal morbidity and  
88 mortality. Since the novel coronavirus (SARS-CoV-2) is new to humans, only limited scientific  
89 evidence is available to identify the impact of the disease on maternal health service delivery and  
90 utilization particularly in low resource settings such as Ethiopia. Accordingly, understanding the  
91 factors that affect maternal health care services delivery and utilization amid the COVID-19  
92 pandemic could help to design appropriate strategies and policies towards the improvement of  
93 maternal health service provision and utilization. Thus, this study aimed to assess the maternal  
94 health care services (ANC, delivery, and PNC) utilization in the amid of the COVID-19  
95 pandemic in West Shoa Zone, central Ethiopia.

## 96 **Materials and Methods**

### 97 **Study design, setting, and population**

98 A community-based cross-sectional study was conducted among women who were pregnant and  
99 those gave birth in the last 6 months of the study period in West Shoa Zone, central Ethiopia  
100 from July 1 to July 30, 2020. West Shoa zone is one of the zones of the Oromia National  
101 Regional state, its capital is located at 114km distance to the western part of Addis Ababa, the  
102 capital city of Ethiopia. Currently, this zone has a total population of 2.5 million with around 1.2  
103 million men and 1.3 women living within an area of 14,788.78 square kilometers. There are

104 about 495,753 women of reproductive age and 100,283 mothers give births per year. West Shoa  
105 zone has 23 districts with over 528 rural kebele and 58 urban kebele. Currently, there are 8  
106 Hospitals, 92 health centers, and 528 health posts in the West Shoa Zone.

## 107 **Sample size determination**

108 The sample size was calculated using a single population proportion formula for the four  
109 maternal health services (ANC, Institutional delivery, and PNC). After calculating the sample  
110 size for the four maternal health services, the largest sample size was used as the overall sample  
111 size of the study. The assumptions considered during sample size calculation includes; 95%  
112 confidence interval, 5% the margin of error, and proportion of ANC visit 46% and proportion of  
113 institutional delivery 29% [13], and the proportion of early PNC visit 47% [14] in West Shoa  
114 zone from the previous study, and 10% non-response rate. The largest sample size calculated was  
115 for the proportion of early PNC visit 47%,  $n = 383$ , and used as the overall sample size of the  
116 study. The final sample size was 844 by considering 10 % non-response rate and the design  
117 effect of 2.

## 118 **Sampling techniques**

119 A multi-stage stratified sampling technique was employed with strata of urban and rural kebele  
120 in the district. Six districts were selected at the first stage by simple random sampling from a  
121 total of 23 districts of West Shoa Zone. Then, kebele from the district was stratified into urban  
122 and rural kebele. Accordingly, one kebele from the urban and two kebeles from rural were  
123 enrolled from the selected districts by simple random sampling. Mothers who were pregnant or  
124 gave birth in the last 6 months of the study were identified by doing a census in collaboration  
125 with health extension workers through home to home visit. Then, number of the study population  
126 was placed to each selected kebele using proportion to population size. After having the list of all

127 women in each selected kebele, mothers were included using systematic random sampling  
128 techniques every interval of four.

## 129 **Data collection tools and quality controls**

130 Data were collected using semi-structured questionnaire through face-to-face interviews. The  
131 questionnaire was adapted from related literature and modified based on the objectives of the  
132 study and the cultural context of the study setting [3-8, 10, 11]. The tool consists of socio-  
133 demographic characteristics, maternal health care services amid COVID-19 pandemic (ANC,  
134 institutional delivery, and PNC) utilization, and impact of governmental emergency states  
135 (transport, distance, mask, and mandatory quarantine). Data collectors were 10 BSc health  
136 professionals, with health officers, Nurse, and Midwifery educational background. Pregnant  
137 mothers and those who gave birth in the last 6 months were identified first by using health  
138 extension workers to get their frame in the community. Data quality was assured during  
139 collection, coding, entry, and analysis. A two-days training was given for the data collectors and  
140 supervisors before actual data collection. The collected data were reviewed and checked for  
141 consistency, clarity; completeness, and accuracy throughout the data collection process by data  
142 collectors and supervisors. Furthermore, the pretest was done among 5% of the sample and the  
143 result was used to modify the tool.

## 144 **Data processing and analysis**

145 Collected data were cleaned and entered using Epi data version 4.6 and analyzed using SPSS  
146 version 23. Descriptive statistics were employed using frequencies, percentages, and diagrams.  
147 Both bivariable and multivariable logistic regressions were performed to identify the presence of

148 a significant association between independent variables and the dependent variable. Those  
149 variables with  $p < 0.2$  in the bivariable analysis were considered for multivariable logistic  
150 regression analysis. Hosmer and Lemeshow goodness of fit test was used to check model fitness  
151 before running the final model. Finally, screened variables were fitted to the multivariable  
152 logistic regression model through a backward stepwise method to reduce the effects of  
153 cofounders and to identify the independent effects of each variable on the outcome variable. An  
154 adjusted odds ratio for a 95% confidence interval was employed for the strength and directions  
155 of association between independent variables and the outcome variables. A P-value of  $< 0.05$  was  
156 used to declare statistical significance.

## 157 **Operational Definitions**

158 Maternal health service utilization was defined as; fully received ANC in line with their  
159 gestational age, having institutional delivery, and any PNC visits during COVID-19. Those  
160 maternal health care services utilization were assessed using yes or no questions.

## 161 **Ethics statement**

162 The ethical clearance was obtained from an ethical review committee of the college of medicine  
163 and health sciences, Ambo University. A letter of support was submitted to each district health  
164 office. Both written and verbal consent was obtained from each study subject before the data  
165 collection process proceeded. During the data collection process, the data collectors had  
166 informed each study participant about the objective and anticipated benefits of the research  
167 project and the study participants were also informed of their full right to refuse, withdraw, or  
168 completely reject part or all of their parts in the study.



169 **Result**

170 **Socio-demographic and economic characteristics of the study**

171 **participants**

172 In this study, a total of 844 pregnant women and those who gave birth in the last 6 months were  
173 included; the response rate was 100%. Two hundred forty-two participants (28.7%) were  
174 between the age of 25-29 years and 320 (37.9%) of them had primary education. More than half,  
175 467 (55.3%) of the participants' occupations were housewives (Table 1).

176 Table 1: Sociodemographic distribution of participants showing maternal health services in the  
177 amid of the COVID-19 pandemic in West Shoa Zone, Central Ethiopia, 2020 (n= 844)

| <b>Characteristics</b>    | <b>Frequency</b> | <b>Percentage</b> |
|---------------------------|------------------|-------------------|
| <b>Maternal age</b>       |                  |                   |
| < 19 years                | 43               | 5.1               |
| 20-24 years               | 229              | 27.1              |
| 25-29 years               | 242              | 28.7              |
| 30-34 years               | 198              | 23.5              |
| 35-39 years               | 102              | 12.1              |
| ≥40 years                 | 30               | 3.6               |
| <b>Marital status</b>     |                  |                   |
| Married                   | 812              | 96.2              |
| Others*                   | 32               | 3.8               |
| <b>Maternal education</b> |                  |                   |
| Cannot read and write     | 165              | 19.5              |
| Primary education         | 320              | 37.9              |
| Secondary education       | 243              | 28.8              |

|                                         |     |      |
|-----------------------------------------|-----|------|
| college and above                       | 116 | 13.7 |
| <b>Place of Residence</b>               |     |      |
| Urban                                   | 560 | 66.4 |
| Rural                                   | 284 | 33.6 |
| <b>Estimated monthly income in birr</b> |     |      |
| < 500                                   | 159 | 18.8 |
| 500-1000                                | 200 | 23.7 |
| 1000-2000                               | 182 | 21.6 |
| > 2000                                  | 303 | 35.9 |
| <b>Maternal occupation</b>              |     |      |
| Housewife                               | 467 | 55.3 |
| Government employee                     | 117 | 13.9 |
| Self-employed                           | 146 | 17.3 |
| Student                                 | 51  | 6.0  |
| Farmer                                  | 63  | 7.5  |
| <b>Husband occupation</b>               |     |      |
| Government employee                     | 222 | 27.5 |
| Self-employed                           | 291 | 36.1 |
| Student                                 | 19  | 2.4  |
| Farmer                                  | 275 | 34.1 |
| <b>Distance to the health facility</b>  |     |      |
| ≤24 km                                  | 531 | 62.9 |
| 25-74 km                                | 168 | 19.9 |
| 75-99 km                                | 115 | 13.6 |
| ≥100 km                                 | 30  | 3.6  |

178

## 179 **Obstetric characteristics of the study participants**

180 Among the 844 participants, 329(39.0%) were prim gravid and 657(77.8%) of them had 1-5 deliveries

181 (parity) (Table 2).

182 Table 2: Obstetric distribution of study participants to assess maternal health services utilization  
183 in the amid of the COVID-19 pandemic in West Shoa Zone, Central Ethiopia, 2020 (n= 844)

| Characteristics                           | Frequency | Percentage |
|-------------------------------------------|-----------|------------|
| <b>Previous adverse pregnancy outcome</b> |           |            |
| Yes                                       | 165       | 19.5       |
| No                                        | 679       | 80.5       |
| <b>Gravidity</b>                          |           |            |
| Prim gravida                              | 329       | 39.0       |
| 2-4                                       | 468       | 55.5       |
| ≥5                                        | 47        | 5.6        |
| <b>Parity</b>                             |           |            |
| Null parity                               | 165       | 19.5       |
| 1-4                                       | 657       | 77.8       |
| ≥5                                        | 22        | 2.6        |

184

### 185 **Awareness on COVID-19 modes of transmission and prevention mechanisms**

186 Among 844 of the participants, 835(98.9%) of them responded that COVID-19 can transmit from person  
187 to person and 230(27.3%) of them think they are at risk of getting the COVID-19 infection. Five hundred  
188 fifty-three, 65.5% were practicing COVID-19 prevention measures that they had received from the  
189 community (Table 3).

190 Table 3: COVID-19 related characteristics to assess maternal health service utilization  
191 among pregnant women and gave birth in the last 6 months of the study period in West Shoa  
192 Zone, Central Ethiopia, 2020 (n= 844)

| <b>Characteristics</b>                                                  | <b>Frequency</b> | <b>Percentage</b> |
|-------------------------------------------------------------------------|------------------|-------------------|
| <b>COVID-19 can transmit from person to person</b>                      |                  |                   |
| Yes                                                                     | 835              | 98.9              |
| No                                                                      | 9                | 1.1               |
| <b>Handshaking with a person having the virus can transmit COVID-19</b> |                  |                   |
| Yes                                                                     | 812              | 96.2              |
| No                                                                      | 32               | 3.8               |
| <b>Sitting nearby a person having the virus can transmit COVID-19</b>   |                  |                   |
| Yes                                                                     | 554              | 65.6              |
| No                                                                      | 290              | 34.4              |
| <b>Body fluid of a person having the virus can transmit COVID-19</b>    |                  |                   |
| Yes                                                                     | 294              | 34.8              |
| No                                                                      | 550              | 65.2              |
| <b>Cough of a person having the virus can transmit COVID-19</b>         |                  |                   |
| Yes                                                                     | 639              | 75.7              |
| No                                                                      | 205              | 24.3              |
| <b>Sexual intercourse with an infected person can transmit COVID-19</b> |                  |                   |
| Yes                                                                     | 25               | 3.0               |
| No                                                                      | 819              | 97.0              |
| <b>At the risk of getting the COVID-19</b>                              |                  |                   |
| Yes                                                                     | 230              | 27.3              |
| No                                                                      | 614              | 72.7              |
| <b>Confidence to protect from COVID-19</b>                              |                  |                   |
| Yes                                                                     | 763              | 90.4              |
| No                                                                      | 81               | 9.6               |
| <b>Fear to visit the health facility</b>                                |                  |                   |
| Yes                                                                     | 481              | 57                |
| No                                                                      | 363              | 43                |
| <b>Information about COVID-19 prevention</b>                            |                  |                   |
| Yes                                                                     | 579              | 68.6              |

|                                                                                 |     |      |
|---------------------------------------------------------------------------------|-----|------|
| No                                                                              | 265 | 31.4 |
| <b>Has sanitizer and/or alcohol</b>                                             |     |      |
| Yes                                                                             | 191 | 22.6 |
| No                                                                              | 653 | 77.4 |
| <b>Use of face mask</b>                                                         |     |      |
| Yes                                                                             | 609 | 77.2 |
| No                                                                              | 235 | 27.8 |
| <b>Practicing COVID-19 prevention measures</b>                                  |     |      |
| Yes                                                                             | 553 | 65.5 |
| No                                                                              | 291 | 34.5 |
| <b>Request permission from the husband to visit the health facility (n=812)</b> |     |      |
| Yes                                                                             | 735 | 90.5 |
| No                                                                              | 77  | 9.5  |
| <b>Media presence</b>                                                           |     |      |
| Yes                                                                             | 722 | 85.5 |
| No                                                                              | 122 | 14.5 |

193 **Reasons for not utilizing maternal health services**

194 Among the 297 participants who did not utilize maternal health services, 109(36.5%) mention  
 195 fear of getting COVID-19 while traveling to receive the service as a reason to not receive the  
 196 service, and 96(32.3%) and 95 (32%) gave fear of COVID-19 transmission from health care  
 197 providers and lack of sanitizer or water in a health facility as a reason not to utilize the maternal  
 198 health services respectively (Fig 1).

199 **Fig 1. Reasons for not using maternal health service utilization during COVID-19, West**  
 200 **Shoa Zone, central Ethiopia, 2020**

## 201 **Prevalence of maternal health service utilization and associated** 202 **factors**

203 In this study, about two-thirds of 547(64.8%) [95% CI: 61.5-68.0] of mothers received maternal  
204 health care service during COVID-19. Binary logistic regression was fitted to assess the  
205 statistical association between factors and maternal health service utilization during the COVID-  
206 19 pandemic. All factors with p-value  $\leq 0.2$  on bi-variable logistic regression were taken to  
207 multivariable analysis to control for potential confounding effects. Accordingly, maternal age,  
208 maternal occupation, husband occupation, educational status, place of residence, distance from  
209 health the facility, estimated monthly income, media presence, marital status, gravidity, parity,  
210 face mask use, fear of COVID-19 infections, permission request from husband to visit a health  
211 facility, sitting nearby a person having the virus can transmit COVID-19, cough of a person  
212 having the virus can transmit COVID-19, sexual intercourse with an infected person can transmit  
213 COVID-19, risk of COVID-19 infection, confidence to protect COVID-19, received information  
214 about COVID-19 prevention, the practice of COVID-19 prevention measure had a p-value  $< 0.2$   
215 at bi-variable logistic regression and therefore taken to the multi-variable logistic  
216 regression. However, maternal educational status, distance from the health facility, monthly  
217 estimated income, fear of COVID-19 infection, permission request from husband to visit a health  
218 facility, and practicing COVID-19 prevention measures were significantly associated with  
219 maternal health service utilization at multivariable logistic regression.

220 The odds of maternal health service utilization during the COVID-19 pandemic in mothers who  
221 had primary education were 2.16 times higher than those who could not read and write  
222 (AOR=2.16, 95% CI: 1.29-3.60). Similarly, mothers who had secondary education had higher

223 odds of maternal health service utilization during the COVID-19 pandemic than those who could  
224 not read and write (AOR=1.97, 95% CI: 1.13-3.44). Moreover, the odds of maternal health  
225 service utilization during the COVID-19 pandemic in mothers who had college and above  
226 education were 2.89 times higher than those who could not read and write (AOR=2.89, 95%  
227 CI:1.34-6.22).

228 Mothers who did travel 25-74 km to reach health facility were 63% less likely to utilize maternal  
229 health service during the COVID-19 pandemic than those who did travel < 24 km to reach health  
230 facility (AOR= 0.37, 95% CI:0.23-0.59). Furthermore, mothers who had to travel 75-99 km to  
231 reach health facilities were 90% less likely to utilize maternal health service during the COVID-  
232 19 pandemic than those who did travel < 24 km to reach health facility (AOR= 0.10, 95%  
233 CI:0.05-0.19). While, mothers who earn 1000-2000 birr had higher odds of utilizing maternal  
234 health service during the COVID-19 pandemic than those who earn <500 birr (AOR= 3.10, 95%  
235 CI: 1.73-5.55). Likewise, the odds of maternal health service utilization during the COVID-19  
236 pandemic were 2.66 higher in mothers who earn  $\geq$ 2000 birr than those who earn <500 birr  
237 (AOR=2.66, 95% CI: 1.52-4.64).

238

239 The odds of utilizing maternal health care service during the COVID-19 pandemic in mothers  
240 who did not fear COVID-19 infection was 2.79 times higher than in those who did fear COVID-  
241 19 infection (AOR= 2.79, 95% CI:1.85-4.20). Moreover, mothers who had not had to request  
242 permission from husband to visit the health facility had 7.24 times higher odds of utilizing  
243 maternal health care service during the COVID-19 pandemic than those who had to request  
244 permission from husband to visit the health facility (AOR= 7.24, 95% CI: 2.65-19.75). The odds

245 of utilizing maternal health care services during the COVID-19 pandemic in those who practice  
 246 COVID-19 prevention measure were 5.82 times higher than in those who did not practice the  
 247 prevention measures (AOR=5.82, 95% CI: 3.87-8.75). The odds of maternal health services  
 248 utilization amidst COVID-19 were 2.06 times higher among mothers who use face mask than  
 249 those mothers who did not use a face mask (AOR= 2.06, 95% CI:1.28-3.31) (Table 4).

250 Table 4: Bi-variable and multi-variable logistic regression to assess factors associated with  
 251 maternal health services in the amid of the COVID-19, West Shoa Zone, central Ethiopia, 2020  
 252 (n=844)

| Variables                  | Maternal health service utilization |     | Crude OR [95% CI] | Adjusted OR [95% CI] |
|----------------------------|-------------------------------------|-----|-------------------|----------------------|
|                            | No                                  | Yes |                   |                      |
| <b>Maternal age</b>        |                                     |     |                   |                      |
| < 19 years                 | 15                                  | 28  | 4.36 (1.60-1.86)  | 3.03 (0.66-13.93)    |
| 20-24 years                | 75                                  | 154 | 4.79(1.09-10.97)  | 2.74(0.84-8.96)      |
| 25-29 years                | 68                                  | 174 | 5.97(1.60-13.69)  | 3.03 (0.71-9.05)     |
| 30-34 years                | 82                                  | 116 | 3.30 (1.02-7.57)  | 3.03 (0.62-9.05)     |
| 35-39 years                | 36                                  | 62  | 4.28(1.05-10.32)  | 4.16 (0.86-13.34)    |
| ≥40 years                  | 21                                  | 9   | 1                 | 1                    |
| <b>Maternal occupation</b> |                                     |     |                   |                      |
| Housewife                  | 192                                 | 275 | 1                 | 1                    |
| Government employee        | 22                                  | 95  | 3.02(1.83-4.97)   | 0.61 (0.28-1.31)     |
| Self-employed              | 42                                  | 104 | 1.73(1.16-2.59)   | 0.74 (0.42-1.30)     |
| Student                    | 22                                  | 29  | 0.92(0.51-1.65)   | 0.62 (0.29-1.36)     |
| Farmer                     | 19                                  | 44  | 1.62 (0.92-2.86)  | 1.97 (0.96-4.03)     |
| <b>Husband occupation</b>  |                                     |     |                   |                      |



|                                         |     |     |                  |                         |
|-----------------------------------------|-----|-----|------------------|-------------------------|
| Government employee                     | 52  | 170 | 3.70(2.50-5.47)  | 0.98 (0.52-1.86)        |
| Self-employed                           | 67  | 224 | 3.78(2.64-5.43)  | 1.49 (0.84-2.64)        |
| Student                                 | 9   | 10  | 1.26(0.50-3.19)  | 1.81 (0.45-7.24)        |
| Farmer                                  | 146 | 129 | 1                | 1                       |
| <b>Educational status</b>               |     |     |                  |                         |
| Cannot read and write                   | 105 | 60  | 1                | 1                       |
| Primary education                       | 103 | 217 | 3.69(2.49-5.47)  | 2.16 (1.29-3.60)        |
| Secondary education                     | 71  | 172 | 4.24(2.78-6.46)  | 1.97 (1.13-3.44)        |
| College and above                       | 18  | 98  | 9.53(5.26-17.26) | 2.89 (1.34-6.22)        |
| <b>Place of residence</b>               |     |     |                  |                         |
| Urban                                   | 143 | 417 | 3.45 (2.56-4.67) | 1.32 (0.73-2.40)        |
| Rural                                   | 154 | 130 | 1                | 1                       |
| <b>Distance</b>                         |     |     |                  |                         |
| <24 km                                  | 117 | 414 | 1                | 1                       |
| 25-74 km                                | 87  | 81  | 0.26 (0.18-.38)  | 0.37 (0.23-0.59)        |
| 75-99 km                                | 80  | 35  | 0.12 (0.08-0.19) | 0.10 (0.05-0.19)        |
| ≥100 km                                 | 13  | 17  | 0.37 (0.17-0.78) | 0.53 (0.21-1.34)        |
| <b>Estimated monthly income in birr</b> |     |     |                  |                         |
| < 500                                   | 87  | 72  | 1                | 1                       |
| 500-1000                                | 108 | 92  | 1.03(0.68-1.56)  | 1.15 (0.66-2.00)        |
| 1000-2000                               | 45  | 137 | 3.68 (2.32-5.82) | <b>3.10 (1.73-5.55)</b> |
| > 2000                                  | 57  | 246 | 5.22 (3.41-7.98) | <b>2.66 (1.52-4.64)</b> |
| <b>Media</b>                            |     |     |                  |                         |
| Yes                                     | 225 | 497 | 3.18 (2.15-4.72) | 1.01 (0.55-1.86)        |
| No                                      | 72  | 50  | 1                | 1                       |
| <b>Marital Status</b>                   |     |     |                  |                         |
| Married                                 | 269 | 528 | 2.89 (1.59-5.28) | 1.96 (0.15-26.08)       |
| Others                                  | 28  | 19  | 1                | 1                       |

|                                                                       |     |     |                    |                          |
|-----------------------------------------------------------------------|-----|-----|--------------------|--------------------------|
| <b>Gravidity</b>                                                      |     |     |                    |                          |
| Prim gravida                                                          | 95  | 234 | 3.63 (1.93-6.81)   | 1.51 (.64-3.52)          |
| 2-4                                                                   | 174 | 294 | 2.49 (1.35-4.59)   | 0.96 (0.43-2.14)         |
| ≥5 pregnancies                                                        | 28  | 19  | 1                  | 1                        |
| <b>Parity</b>                                                         |     |     |                    |                          |
| Null para                                                             | 57  | 108 | 4.06 (1.57-10.53)  | 2.73 (0.53-14.00)        |
| 1-4                                                                   | 225 | 432 | 4.11 (1.65-10.24)  | 2.16 (0.49-9.57)         |
| ≥ 5                                                                   | 15  | 7   | 1                  | 1                        |
| <b>Use face mask</b>                                                  |     |     |                    |                          |
| Yes                                                                   | 109 | 126 | 1.94(1.42-2.64)    | <b>2.06 (1.28-3.31)</b>  |
| No                                                                    | 188 | 421 | 1                  | 1                        |
| <b>Fear of COVID-19 infection</b>                                     |     |     |                    |                          |
| Yes                                                                   | 212 | 269 | 1                  | 1                        |
| No                                                                    | 85  | 278 | 2.58 (1.91-3.49)   | <b>2.79 (1.85-4.20)</b>  |
| <b>Permission request from husband to visit the health facility</b>   |     |     |                    |                          |
| Yes                                                                   | 264 | 471 | 1                  | 1                        |
| No                                                                    | 11  | 66  | 3.36 (1.75-6.48)   | <b>7.24 (2.65-19.75)</b> |
| <b>Sitting nearby a person having the virus can transmit COVID-19</b> |     |     |                    |                          |
| Yes                                                                   | 171 | 383 | 1.72 (1.28-2.31)** | 0.87 (0.56-1.34)         |
| No                                                                    | 126 | 164 | 1                  | 1                        |
| <b>Cough of a person having the virus can transmit COVID-19</b>       |     |     |                    |                          |

|                                                                         |     |     |                  |                         |
|-------------------------------------------------------------------------|-----|-----|------------------|-------------------------|
| Yes                                                                     | 202 | 437 | 1.87 (1.36-2.58) | 1.24 (0.79-1.93)        |
| No                                                                      | 95  | 110 | 1                | 1                       |
| <b>Sexual intercourse with an infected person can transmit COVID-19</b> |     |     |                  |                         |
| Yes                                                                     | 4   | 21  | 2.92(0.99-8.60)  | 1.90 (0.55-6.57)        |
| No                                                                      | 293 | 526 | 1                | 1                       |
| <b>Risk of COVID-19 infection</b>                                       |     |     |                  |                         |
| Yes                                                                     | 53  | 177 | 2.20 (1.56-3.12) | 1.52 (0.98-2.38)        |
| No                                                                      | 244 | 370 | 1                | 1                       |
| <b>Confidence to protect COVID-19</b>                                   |     |     |                  |                         |
| Yes                                                                     | 262 | 501 | 1.46 (0.92-2.32) | 1.69 (0.86-3.30)        |
| No                                                                      | 35  | 46  | 1                | 1                       |
| <b>Received information about COVID-19 prevention</b>                   |     |     |                  |                         |
| Yes                                                                     | 166 | 413 | 2.43 (1.80-3.29) | <b>0.71 (0.22-2.24)</b> |
| No                                                                      | 131 | 134 | 1                | 1                       |
| <b>Practice COVID-19 prevention measure</b>                             |     |     |                  |                         |
| Yes                                                                     | 148 | 405 | 2.87 (2.13-3.87) | <b>5.82 (3.87-8.75)</b> |
| No                                                                      | 149 | 142 | 1                | 1                       |

## 254 **Discussion**

255 This study found the prevalence of maternal health service utilization was 64.8% [95%CI: 61.5-  
256 68.0]. This prevalence is lower than the studies done in Ethiopia before the COVID-19 pandemic  
257 [14, 15]. This might be due to the lockdown and movement restrictions brought about by the  
258 ongoing pandemic and lack of transportation manifested as a result [16]. Also, the dread and  
259 anxiety of visiting hospitals during COVID-19 has led many women to change their plan of  
260 childbirth and they are planning to have home deliveries [6].

261 The current study reported that the odds of maternal health service utilization during the COVID-  
262 19 pandemic were higher among mothers who had primary, secondary, and college and above  
263 education than those who could not read and write. This is consistent with the study done in  
264 developing countries [17], and Nigeria [18]. Moreover, mothers who earn more than 1000 birr  
265 per month had higher odds of utilizing maternal health service during the COVID-19 pandemic  
266 than those who earn < 500 birr. This is in agreement with the study done in developing countries  
267 [17], and Nepal [19]. This is because economically independent women do not rely on other  
268 people to decide to utilize maternal health services [20].

269 Furthermore, mothers who did travel 25-74 km and 75-99 km to reach the health facility were  
270 63% and 90% less likely to utilize maternal health service during the COVID-19 pandemic than  
271 those who did travel < 24 km to reach the health facility respectively. This might be due to a  
272 change of plan of ANC follow-up, childbirth, and other maternal health services hence the first  
273 delay, and planning to have home deliveries [6, 20]. Besides, the odds of utilizing maternal  
274 health service during the COVID-19 pandemic in mothers who did not fear COVID-19 infection

275 was 2.79 times higher than those who did fear COVID-19 infection. This could be due to the  
276 psychological and social effects of the COVID-19 pandemic which is more pronounced in  
277 women forcing them to plan home deliveries not to expose their family to the infection [6].  
278 Besides, mothers who had not had to request permission from husband to visit health facility had  
279 the higher odds of utilizing maternal health service during the COVID-19 pandemic than those  
280 who had to request permission from the husband to visit a health facility. This is consistent with  
281 the studies done in Ethiopia [14, 21]. This might be due to women's autonomy is positively  
282 associated with maternal health service utilization. Also, women with control over resources  
283 including physical, human, intellectual, and financial resources are more independent in deciding  
284 and seeking health care [21]. The odds of utilizing maternal health service during the COVID-19  
285 pandemic in those who practice COVID-19 prevention measure was 5.82 times higher than in  
286 those who did not practice the prevention measure Similarly, the odds of maternal health service  
287 utilization amidst COVID-19 were 2.06 times in mothers who use face mask than those mothers  
288 who did not use a face mask. This is following the study done in Iran [22].

## 289 **Conclusion**

290 In this study, the prevalence of maternal health service utilization was found low. Furthermore,  
291 maternal educational status, distance from the health facility, monthly estimated income, fear of  
292 COVID-19 infection, permission request from husband to visit a health facility, and practicing  
293 COVID-19 prevention measures were found to be significantly associated with maternal health  
294 service utilization. The federal ministry of health and regional health bureau should work in  
295 collaboration to aware of the community and mothers, in particular, to increase the maternal

296 health service during the pandemic while practicing the necessary preventive measures to control  
297 the spread of the infection.

298 **List of abbreviations:** ANC-Antenatal Care; **COVID-19:** Corona Virus Disease  
299 2019; **PNC:** Postnatal Care; **WHO-**World Health Organization

300 **Acknowledgments:** The authors are grateful to the participants of the study who  
301 shared their time to give their genuine responses, data collectors, and supervisors of the study.

## 302 **References**

- 303 1. Rasmussen SA, Smulian JC, Lednický JA, Wen TS, Jamieson DJ. Coronavirus Disease  
304 2019 (COVID-19) and Pregnancy: What obstetricians need to know. American journal of  
305 obstetrics and gynecology; 2020: 415-426
- 306 2. Cucinotta D, Vanelli M. WHO declares COVID-19 a pandemic. Acta bio-medica: Atenei  
307 Parmensis. 2020; 91(1):157-60.
- 308 3. World Health Organization. Coronavirus disease (COVID-2019) situation reports.  
309 Available on: <https://www.who.int/emergencies/diseases/novel-coronavirus-2019>.  
310 Accessed: 26 June, 2020 .
- 311 4. Tolu LB, Jeldu WG. Guidelines and best practice recommendations on reproductive  
312 health services provision amid COVID-19 pandemic: Scoping review. Available on  
313 <https://www.researchsquare.com/article/rs-25322/v1>. Accessed: 23 Sept, 2020.
- 314 5. Dashraath P, Wong JIJ, Karen LMX, Min LL, Sarah L, Biswas A, et al. Coronavirus  
315 disease 2019 (COVID-19) pandemic and pregnancy. American journal of obstetrics and  
316 gynecology. 2020;222(6):521-531.

- 317 6. Pant S, Koirala S, Subedi M. Access to Maternal Health Services during COVID-19.  
318 Europasian J Med Sci. 2020; 2(Covid-19 Special Issue): 48-53.
- 319 7. Saccone G, Florio A, Aiello F, Venturella R, De Angelis MC, Locci M, et al.  
320 Psychological impact of coronavirus disease 2019 in pregnant women. American Journal  
321 of Obstetrics & Gynecology. 2020 223(2): 293–295
- 322 8. Feyissa GT, Tolu LB, Ezeh A. Impact of COVID-19 Pandemic on Sexual and  
323 Reproductive Health and Mitigation Measures: The Case of Ethiopia. African Journal of  
324 Reproductive Health. 2020;24(2):24-6.
- 325 9. Burgoyne ME, Elsamadicy EA, Cojocar L, Desai A. COVID-19 Barriers to Care for  
326 Pregnant Patients in Prolonged Isolation. Case Reports in Obstetrics and Gynecology.  
327 2020;2020:4.
- 328 10. Abdelbadee AY, Abbas AM. Impact of COVID-19 on reproductive health and maternity  
329 services in low resource countries. The European Journal of Contraception &  
330 Reproductive Health Care. 2020;25(5)402-404.
- 331 11. Akseer N, Kandru G, Keats EC, Bhutta ZA. COVID-19 pandemic and mitigation  
332 strategies: implications for maternal and child health and nutrition. The American journal  
333 of clinical nutrition. 2020;112(2):251-6.
- 334 12. Navaneetham K, Dharmalingam A. Utilization of maternal health care services in  
335 Southern India. Social science & medicine. 2002;55(10):1849-69.
- 336 13. Wilunda C, Quaglio G, Putoto G, Takahashi R, Calia F, Abebe D, et al. Determinants of  
337 utilization of antenatal care and skilled birth attendant at delivery in South West Shoa  
338 Zone, Ethiopia: a cross-sectional study. Reproductive Health. 2015;12(1):74.

- 339 14. Mengistu M, Beyene T, Ho D, Bayeta A. Maternal Health Service Utilization and  
340 Associated Factors among Mothers with Children under one Year in Ambo District, West  
341 Shoa Zone, Central Ethiopia, 2018. Available on:  
342 <https://www.researchsquare.com/article/rs-6092/v1>. Accessed on: 01 Oct, 2020.
- 343 15. Ethiopian Public Health Institute, Federal Ministry of Health, Addis Ababa, Ethiopia, and  
344 The DHS Program, ICF, Rockville, Maryland, USA. Ethiopia: Mini Demographic and  
345 Health Survey 2019 - Key Indicators.
- 346 16. Mahato P, Tamang P, Simkhada P, Shahi P, van Teijlingen E, Aryal N, et al. Effects of  
347 COVID-19 during the lockdown in Nepal. *Europasian Journal of Medical Sciences*.  
348 2020;2(Covid-19 Special Issue):1-11.
- 349 17. Ahmed S, Creanga AA, Gillespie DG, Tsui AO. Economic status, education and  
350 empowerment: implications for maternal health service utilization in developing  
351 countries. *PloS one*. 2010;5(6):e11190.
- 352 18. Babalola S, Fatusi A. Determinants of use of maternal health services in Nigeria-looking  
353 beyond individual and household factors. *BMC pregnancy and childbirth*. 2009;9(1):43.
- 354 19. Adhikari R. Effect of Women's autonomy on maternal health service utilization in Nepal:  
355 a cross sectional study. *BMC women's health*. 2016;16(1):26.
- 356 20. Akaba G, Dirisu O, Okunade K, Adams E, Ohioghame J, Obikeze O, et al. Impact of  
357 COVID-19 on utilization of maternal, newborn and child health services in Nigeria:  
358 protocol for a country-level mixed-methods study. *F1000Research*. 2020;9(1106):1106.
- 359 21. Tiruneh FN, Chuang K-Y, Chuang Y-C. Women's autonomy and maternal healthcare  
360 service utilization in Ethiopia. *BMC health services research*. 2017;17(1):718.



361 22. Mirzadeh M, Khedmat L. Pregnant women in the exposure to COVID-19 infection  
362 outbreak: the unseen risk factors and preventive healthcare patterns. The Journal of  
363 Maternal-Fetal & Neonatal Medicine. 2020:1-2.

364

365
